# Supplementary material for: IFNγ-Producing B Cells Play a Regulating Role in Infection-Mediated Inhibition of Allergy
Source: MDPI journal article supplement (doi:10.3390/biology12091259), 2023-09-20
Supplement: s1 [file s1]

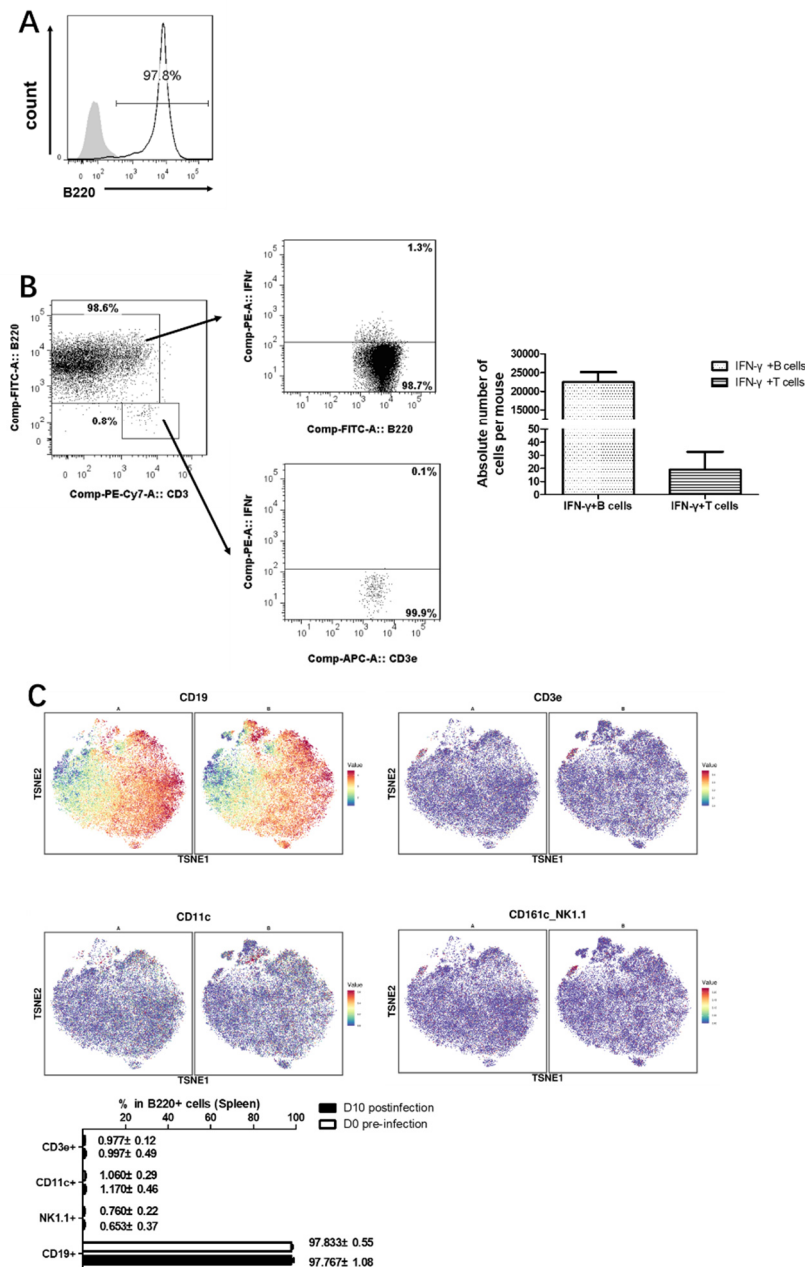

**Supplementary Figure S1.** The purity and the constitution of the isolated B220+ cells. B220+ cells were isolated and purified using MACS columns as described in Methods. (A) The purified cells were stained with anti-B220 mAb and detected by flow cytometry. (B) The percentage and absolute number of IFN $\gamma$ + cells were detected by intracellular staining of flow cytometry. (C) B220+ cells were analyzed for percentages of CD19+ cells, NK1.1+ cells, CD11c+ cells by flow cytometry. Data are shown as the mean  $\pm$  SD of each group. Each group includes three or more mice. One representative experiment of three independent experiments is shown. \*,  $p < 0.05$ ; \*\*,  $p < 0.01$ ; \*\*\*,  $p < 0.001$ .

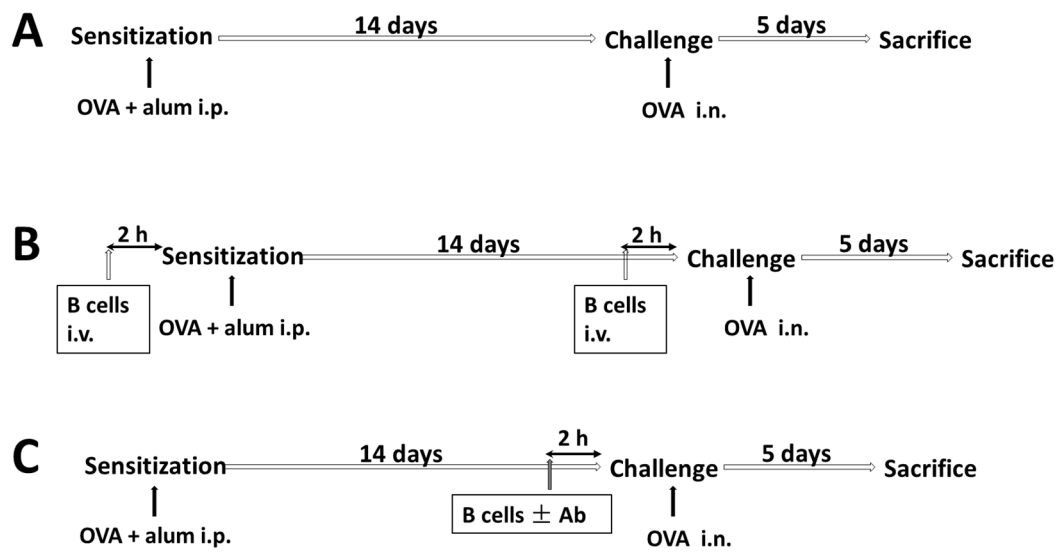

**Supplementary Figure S2.** Schedules of experimented design. (A) The basic model and the timeline of sensitization/challenge with OVA. (B) The timeline of B cell adoptive transfer. (C) The timeline of intranasal B cell transfer and simultaneous antibody treatment.

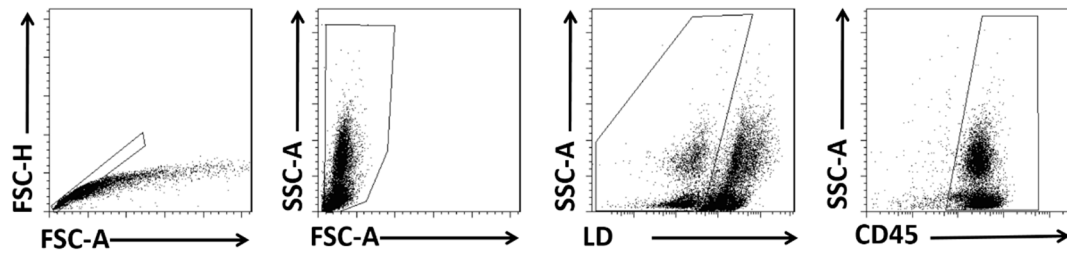

**Supplementary Figure S3.** The gating strategy for flow cytometry. Cells were prepared and stained with specific antibodies. FSC-H/FSC-A were used for gating single cell, SSC-A/FSC-A were then used for gating target cell population, followed by excluding LD<sup>+</sup> dead cells. CD45<sup>+</sup> cells were gated for leukocytes.
